1 School bullying and social adaptation in Chinese adolescents: A  
2 multiple mediation model of self-disclosure and school  
3 connectedness

4 Guo-Xing Xiang<sup>1</sup>, Xiong Gan<sup>1\*</sup>, Pin-Yi Wang<sup>1</sup>, Rui-Jin Zhang<sup>1</sup>, Xin Jin<sup>2</sup>, Hao Li<sup>1</sup>

5 <sup>1</sup> Department of Psychology, College of Education and Sports Sciences, Yangtze

6 University, Jingzhou, China;

7 <sup>2</sup> Yangtze University College of Technology and Engineering, Jingzhou, China

8 \*Corresponding author

9 Phone number: 15272531642

10 E-mail: 307180052@qq.com (X. Gan).

## 11 Abstract

12 **Background:** When it comes to the occurrence place of bullying behavior, school can  
13 never be ignored because adolescents spend a lot of time in school. School bullying  
14 has become a significant social issue among young generations, which influences  
15 their healthy growth. However, our understanding of the effects of school bullying is  
16 still limited. So, the present study aims to investigate how school bullying affects  
17 adolescent social adaptation.

18 **Methods:** A sample of 434 Chinese adolescents (56.9% females;  $M_{age}=13.07$  years,  
19  $SD=0.93$ ) participated in the survey. Structural equation modeling was adopted to  
20 assess the hypothesized model.

21 **Results:** The results indicated that school bullying had a direct effect on negative  
22 social adaptation rather than positive social adaptation. Moreover, self-disclosure and

NOTE: This preprint reports new research that has not been certified by peer review and should not be used to guide clinical practice.

23 school connectedness mediated the relationship between school bullying and social  
24 adaptation, separately and sequentially.

25 **Conclusions:** The present study combines self-disclosure and school connectedness  
26 into a multiple mediation model, highlighting the importance of individual and  
27 environmental factors in the effects of school bullying on adolescents' social  
28 adaptation. Practically, the current findings may provide some guidance for the  
29 prevention and intervention of school bullying and the promotion of social adaptation  
30 in adolescents.

31 **Keywords:** School Bullying, Social Adaptation, School Connectedness,  
32 Self-Disclosure, Mediation Model, Chinese Adolescent

## 33 **1. Introduction**

34 Bullying is defined as aggressive behavior that happens intentionally and  
35 repeatedly, which usually involves an imbalance of power [1]. Bullying can take  
36 different forms, including physical bullying (e.g., pushing), verbal bullying (e.g.,  
37 teasing), social exclusion (e.g., ignoring someone) and other indirect forms (e.g.,  
38 spreading rumors), and it always includes at least one bully and one victim [2]. An  
39 increasing number of studies have demonstrated that bullying can result in  
40 developmental problems and other negative outcomes, including mental disorders  
41 (e.g., anxiety and depression), personality disorders (e.g., antisocial personality),  
42 behavioral problems (e.g., crime), poor health, poor wealth, and lower subjective  
43 well-being [3-8]. Therefore, understanding how bullying affects adolescents'  
44 development is crucial in the prevention and intervention of bullying.

45        When it comes to the occurrence place of bullying behavior, school can never be  
46 ignored because adolescents spend a lot of time in school. A recent survey has  
47 reported that one in three (32%) students experience bullying by peers at school [9].  
48 Therefore, more and more scholars pay attention to school bullying, where they have  
49 made great achievements in its antecedents (e.g., neuroticism, loneliness, and parental  
50 behavioral control) [10, 11] and consequences (e.g., substance use) [12]. Few studies,  
51 however, focus on the relationship between school bullying and social adaptation,  
52 which is an important indicator of individual socialization. To address this research  
53 gap, the present study aims to investigate the relationship between school bullying  
54 and social adaptation and explore the underlying mechanisms between them. This will  
55 contribute to adolescents' social adaptation by preventing them from suffering school  
56 bullying.

## 57    **1.1. School Bullying and Social Adaptation**

58        Social adaptation refers to the dynamic process by which individuals change  
59 attitudes and behaviors in order to maintain a harmonious and balanced relationship  
60 with their social environment [13]. According to the area-function conceptual model  
61 of adolescent social adaptation, social adaptation consists of two functional states:  
62 positive and negative social adaptation, and good social adaptation is  
63 comprehensively shaped by two aspects: a high level of positive social adaptation and  
64 a low level of negative social adaptation [14].

65        Positive social adaptation involves behaviors promoting healthy development and  
66 meeting social norms, such as self-affirmation, active coping, and prosocial tendency

67 [14]. Empirical evidence has indirectly indicated the potential association between  
68 school bullying and positive social adaptation. For instance, self-esteem and  
69 self-efficacy (both included in self-affirmation) are negatively correlated with school  
70 bullying [15-18]. Similarly, a negative association between prosocial behaviors and  
71 school bullying has also been reported among New Zealand students [19]. Moreover,  
72 recent studies have revealed that active coping can buffer the detrimental influence of  
73 bullying [20, 21]. In sum, this literature jointly suggests that adolescents with  
74 experience of school bullying tend to develop lower levels of self-affirmation, active  
75 coping, and prosocial tendencies. Given that the three facets of positive social  
76 adaptation are negatively associated with school bullying, it is reasonable to assume  
77 that school bullying will negatively predict positive social adaptation.

78 Negative social adaptation, on the other hand, refers to behaviors uncondusive to  
79 individual growth, such as self-trouble, social alienation, and social withdrawal [14].  
80 Prior studies have revealed that social alienation can be positively predicted by school  
81 bullying [22, 23]. Moreover, compared with non-school bully/victim students,  
82 adolescents involved in bullying have a higher level of social withdrawal [24]. This  
83 indirect evidence, to a certain degree, implies a positive association between school  
84 bullying and negative social adaptation. In addition, developmental contextualism  
85 emphasizes that people have an impact on the environment and that individual  
86 development will be shaped by the environment as well [25]. Bullying perpetration  
87 can be regarded as a kind of negative influence of adolescents on their peers in the  
88 same environment, which will trigger a series of adverse effects on the social

89 adaptation of bullies. For instance, bullies will be punished by their school and family,  
90 and their peers will not be willing to develop friendships with them. In the long term,  
91 individuals who are involved in bullying will develop more maladaptive behaviors  
92 such as theft, violence, binge-drinking, and smoking [26, 27]. Accordingly, it is  
93 reasonable to assume that school bullying will positively predict negative social  
94 adaptation. Overall, involvement in bullying perpetration at school will be destructive  
95 to adolescents' adaptive development. Thus, the present study hypothesizes that  
96 school bullying will negatively predict positive social adaptation and positively  
97 predict negative social adaptation (H1).

## 98 **1.2. Mediating Effect of Self-Disclosure**

99 It is worthwhile to note that the relationship between school bullying and social  
100 adaptation may be direct or indirect. The present study attempts to further explore the  
101 potential mediators between the aforesaid relationship. Self-disclosure, a possible  
102 mediator, is defined as the behavior of revealing private information about oneself to  
103 others [28]. Studies on self-disclosure usually focus on its breadth and depth. The  
104 former means the wide range of content disclosed, while the latter represents the  
105 degree of privacy of information disclosed [29]. Self-disclosure plays an important  
106 role in the development of relationships with family, friends, and partners [30].  
107 Likewise, self-disclosure might also have an essential impact on the association  
108 between school bullying and social adaptation, which will be discussed in the  
109 following two paragraphs.

110 Abundant studies have confirmed that self-disclosure is closely linked to various

111 forms of bullying. For instance, Georgiou and Stavrinides [31] found that early  
112 adolescents with bullying experience at school show less self-disclosure. Similarly,  
113 among middle school girls, Jones et al. [32] reported that girls involved in school  
114 bullying are less likely to disclose themselves. Both the findings support the negative  
115 effect of school bullying on self-disclosure. In addition, an analogous negative  
116 relationship is also revealed between cyberbullying and self-disclosure [33-36].  
117 Considering the prior evidence, it is reasonable to propose that school bullying will  
118 negatively predict self-disclosure among adolescents.

119 Besides, self-disclosure is also tightly associated with social adaptation  
120 throughout a lifetime. According to social penetration theory, self-disclosure is of  
121 vital importance in the development of interpersonal relationships since the process of  
122 self-disclosure will strengthen the relationship in a penetrating way [37], which in  
123 turn avoids maladaptive outcomes such as social alienation and withdrawal. Empirical  
124 studies have also demonstrated a significantly positive association between  
125 self-disclosure and social adaptation among adults and university students [38-40].  
126 Moreover, Yu[41] revealed a similar finding that adolescents with a high level of  
127 self-disclosure are more likely to develop better social adaptation. Therefore, based on  
128 the above theory and evidence, it is appropriate to deduce that self-disclosure will  
129 significantly predict more positively adaptive outcomes and fewer maladaptive  
130 outcomes.

131 Given the independent associations between self-adaptation and the two  
132 variables, the present study attempts to further assess the mediating effect of

133 self-disclosure on the relationship between school bullying and social adaptation. In a  
134 study of overweight adolescents, Adams and Cantin [42] revealed the buffering effect  
135 of self-disclosure on the negative impacts of peer bullying on depression, which  
136 supports the assumption of the mediating effect of self-disclosure in the present study.  
137 Consequently, the present study hypothesizes that self-disclosure will significantly  
138 mediate the relationship between school bullying and social adaptation (H2).

### 139 **1.3. Mediating Effect of School Connectedness**

140 School connectedness, in addition to self-disclosure, might also play a mediating  
141 role in the relationship between school bullying and social adaptation. School  
142 connectedness refers to the emotional connection established between individuals and  
143 schools, as well as the people in school, which reflects the students' sense of  
144 belonging and identity to school, and their feelings of being cared for, recognized, and  
145 supported in school [43]. School connectedness is an effective factor in the prevention  
146 of developmental problems [44]. Therefore, it is worthwhile to evaluate its protective  
147 functions in the present topic.

148 Prior literature has provided both indirect and direct evidence linking school  
149 connectedness with the two major variables. In terms of the association between  
150 school bullying and school connectedness, Skues et al. [45] found that, with higher  
151 engagement in school bullying, adolescents will feel unsafe and unfriendly, and tend  
152 to disconnect with their peers, teachers, and schools. Moreover, Diaz et al. [46] and  
153 O'Brennan and Furlong [47] repeatedly revealed the stably negative association  
154 between school bullying and connectedness. Therefore, it is reasonable to believe the

155 negative influence of school bullying on school connectedness among adolescents. As  
156 for the association between school connectedness and social adaptation, a longitudinal  
157 study suggests that school connection can predict a lower level of adaptation problems  
158 in early adolescents one year later [48]. Additionally, Yin et al. [49] indicated that  
159 middle school students who are highly connected with their schools are more easily  
160 adapted to society. School is a micro-society with some characteristics of real society,  
161 and it provides a platform for adolescents to rehearse and prepare. So, the connection  
162 with school reflects the social function of students to a certain extent. It is not too  
163 difficult for adolescents with strong social functions to adapt to today's complex  
164 society. Overall, school bullying could negatively influence school connection, which  
165 in turn would predict less positive social adaptation and more maladaptive outcomes.

166 Moreover, the risk-buffering model highlights that protective factors can alleviate  
167 the negative influence of risk factors on individual growth [50]. Liu et al. [51]  
168 revealed that school connectedness can buffer the adverse effect of bullying on  
169 psychological well-being. Furthermore, Loukas and Pasch [52] indicated that school  
170 connectedness alleviates the impact of bullying victimization on subsequent  
171 adjustment problems of girls in early adolescence. Both of the empirical findings  
172 point to the protective function of school connectedness between risk factors and  
173 individual development. Therefore, the present study hypothesizes that school  
174 connectedness will mediate the relationship between school bullying and social  
175 adaptation (H3).

#### 176 **1.4. Self-Disclosure and School Connectedness**



177 As reviewed above, both self-disclosure and school connectedness are associated  
178 with school bullying and social adaptation. Furthermore, there might be another  
179 potential association between self-disclosure and school connectedness. The  
180 disclosure reciprocity effect suggests that, in social interaction, one's self-disclosure  
181 will trigger the other's self-disclosure [53]. This process is necessary in the  
182 development of a relationship because knowing each other is a prerequisite for  
183 establishing a relationship. In school, students disclose themselves to let peers and  
184 teachers understand them, allowing them to feel cared for, recognized, and supported.  
185 Long term, students may discover similarities among themselves, resulting in a sense  
186 of belonging and identity to the group and school. That is, they are connected to their  
187 schools.

188 Besides, social penetration theory suggests that telling others about one's private  
189 information is beneficial to establishing a good connection [37]. Empirical research  
190 has found that disclosing will make the interaction or relationship more intimate and  
191 stable [54, 55]. For instance, Lee et al. [56] revealed that self-disclosure can improve  
192 received social support, which increases an individual's feeling of well-being.  
193 Similarly, Zhang's study [57] also suggested that disclosure is positively related to  
194 social support. So, self-disclosure makes adolescents feel supported, which is helpful  
195 in building connections with peers and teachers. Adolescents' self-disclosure in social  
196 interaction can positively influence the content of connectedness in school.

197 Overall, school bullying could negatively influence adolescents' self-disclosure  
198 and school connectedness, and all of them have effects on adolescents' social

199 adaptation. Moreover, self-disclosure could foster a better level of connection with  
200 school. In light of these complicated associations, the present study attempts to further  
201 explore whether self-disclosure and school connectedness will function as a chain  
202 mediating effect in the aforesaid relationship. That is, engagement in school bullying  
203 will make adolescents feel unsafe, and they will not be willing to share private  
204 information, so it is difficult for them to build intimate connections with their peers,  
205 teachers, and schools, which in turn is detrimental to their adaptative development.  
206 Accordingly, the present study hypothesizes that self-disclosure and school  
207 connectedness may have a serial mediating effect on the relationship between school  
208 bullying and social adaptation (H4).

## 209 **1.5. The present study**

210 With the combination of several theories and previous evidence, we realized the  
211 complex relationship between school bullying and social adaptation among  
212 adolescents. Little research, however, has compared the direct and indirect  
213 associations in the aforesaid relationship, as well as the comparison of three possibly  
214 mediating pathways. This comparison, in practice, will be in the service of better  
215 assisting adolescents to circumvent the adverse impacts of school bullying on their  
216 adaptative development. Therefore, the present study aims to fill this knowledge gap  
217 and construct a serial mediation model with hypotheses that (Figure 1):

218 ***H1:** School bullying will negatively predict positive social adaptation and*  
219 *positively predict negative social adaptation.*

220 ***H2:** Self-disclosure will mediate the relationship between school bullying and*

221 *social adaptation.*

222 **H3:** *School connectedness will mediate the relationship between school bullying*

223 *and social adaptation.*

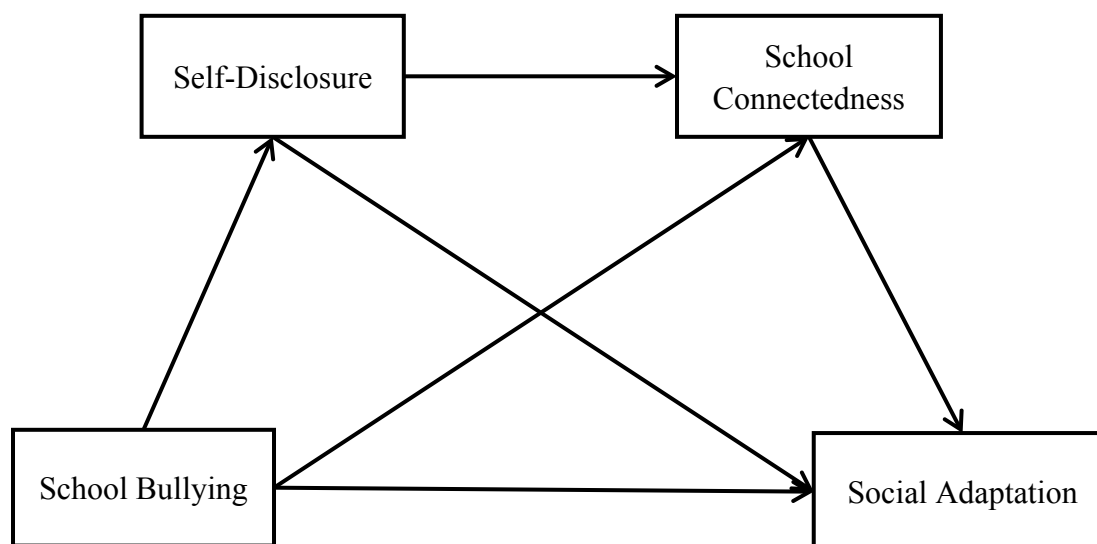

**Figure 1. The relationship between school bullying and social adaptation among adolescents**

224 **H4:** *Self-disclosure and school connectedness may have a serial mediating effect*

225 *on the relationship between school bullying and social adaptation.*

## 226 **2. Method**

### 227 **2.1. Participants and Procedure**

228 A total of 434 junior high school students were recruited from Guizhou province,

229 southwest China. Of these, 247 (56.9%) were female. Their ages ranged from 11 to 17

230 years old, and the average age was 13.07 years ( $SD=0.93$ ). This study was approved

231 by the Research Ethics Committee of the College of Education and Sports Sciences,

232 Yangtze University. After obtaining informed consent verbally, students were asked

233 to finish a questionnaire on school bullying, social adaptation, school connectedness,

234 self-disclosure, and several basic information such as gender and age within half an

235 hour. At the end, researchers collected all the questionnaires and thanked them for  
236 participating. Students were informed that participation was entirely voluntary, and  
237 they did not receive any compensation for participation.

## 238 **2.2. Measures**

239 *School Bullying.* Adolescent school bullying was measured by the Bully Subscale  
240 taken from the Adapted Chinese Version of the Revised Olweus Bully/Victim  
241 Questionnaire (ROBVQ) [58, 59]. It consists of seven items evaluated on a four-point  
242 scale (0 = never; 4 = several times a week), assessing four kinds of bully behaviors,  
243 including physical bullying, verbal bullying, social bullying, and cyberbullying. One  
244 example item is, “I posted some students' secrets, private or embarrassing photos on  
245 the Internet.” A higher score indicates more bullying behaviors. In this study, its  
246 Cronbach’s alpha coefficient was 0.833.

247 *Social Adaptation.* Adolescent social adaptation was measured by the Adolescent  
248 Social Adjustment Assessment Scale (ASAAS) [14]. This scale has 50 items in total,  
249 eight dimensions including self-affirmation, active coping, prosocial tendency, acting  
250 efficiency, self-trouble, social alienation, violations, and social withdrawal. The first  
251 four dimensions are considered the Subscale of Positive Social Adaptation, with a  
252 higher score indicating better positive social adaptation; the other four dimensions are  
253 considered the Subscale of Negative Social Adaptation, with a higher score meaning  
254 worse negative social adaptation. One example item is “I am not happy at all”.  
255 Responses range from “1 = totally inconsistent” to “5 = totally consistent”. Its  
256 Cronbach’s alpha coefficient was 0.703 in this study.

257 *Self-disclosure.* Adolescent self-disclosure was measured by the Adolescent  
258 Self-Disclosure with Peers Questionnaire (ASDPQ) [60]. This questionnaire includes  
259 37 items, seven dimensions such as interests and study experience. One example item  
260 is “I will tell my classmates who are not so close to me about my exam results”. Items  
261 were evaluated on a five-point scale (1 = almost nothing; 5 = anything), with a higher  
262 score indicating a better level of self-disclosure. Its Cronbach’s alpha coefficient was  
263 0.977 in this study.

264 *School Connectedness.* Adolescent school connectedness was measured by the  
265 Adolescent School Connectedness Scale (ASCS) [61]. It contains 10 items and three  
266 dimensions, such as teacher support, peer support, and school belonging. One  
267 example is, “I feel happy and safe in my school.” Items were rated on a five-point  
268 scale, ranging from “1 = totally inconsistent” to “5 = totally consistent”. A higher  
269 score indicates a better connection with school. In this study, its Cronbach’s alpha  
270 coefficient was 0.832.

## 271 **2.3. Data Analysis**

272 SPSS 26.0 and PROCESS macro were used for data analysis [62]. First,  
273 preliminary analyses such as descriptive and correlational statistics were performed in  
274 SPSS 26.0 to assess whether the variables were associated with each other. Then,  
275 mediation analyses were conducted through model six in PROCESS macro to  
276 examine the mediating roles of school connectedness and self-disclosure between  
277 school bullying and social adaptation.

## 278 **3. Results**

### 279 **3.1. Common Method Biases Analyses**

280 Since the data were from participants' self-report questionnaire, it is necessary to  
281 avoid common method biases. And the Harman single factor method was  
282 recommended to detect it [63]. Results showed that there were 39 factors with a  
283 characteristic value greater than one. Additionally, the first factor explained a  
284 variation of 18.44%, less than the 40% critical value. That is, the results of the present  
285 study were less influenced by common method biases.

### 286 **3.2. Descriptive Statistics and Correlation Analyses**

287 Means and standard deviations for all variables are displayed in Table 1.  
288 Chi-square tests reported significant gender differences in school bullying ( $\chi^2 = 6.771$ ,  
289  $p < 0.01$ ). Boys had more bullying behaviors in school than girls. And  $t$  tests found  
290 that girls' positive social adaptation ( $t = -2.037$ ,  $p < 0.05$ ), self-disclosure ( $t = -3.109$ ,  
291  $p < 0.01$ ) and school connectedness ( $t = -3.893$ ,  $p < 0.001$ ) were much better than  
292 boys', while boys were the same as girls in negative social adaptation ( $t = 1.948$ ,  $p >$   
293  $0.05$ ). Besides, grade differences were also significant in both positive ( $t = 2.429$ ,  $p <$   
294  $0.05$ ) and negative ( $t = -2.693$ ,  $p < 0.01$ ) social adaptation. Compared with eighth  
295 grade students, adolescents in seventh grade had a higher level of positive social  
296 adaptation and a lower level of negative social adaptation. Hence, gender and grade  
297 were considered as control variables in the following analyses.

**Table 1. Descriptive statistics for key variables**

| Variable | Boys     |           | Girls    |           |
|----------|----------|-----------|----------|-----------|
|          | <i>M</i> | <i>SD</i> | <i>M</i> | <i>SD</i> |
| 1. SB    | 0.134    | 0.341     | 0.061    | 0.239     |
| 2. PSA   | 3.484    | 0.748     | 3.623    | 0.668     |

|        |       |       |       |       |
|--------|-------|-------|-------|-------|
| 3. NSA | 2.169 | 0.698 | 2.045 | 0.622 |
| 4. SD  | 2.414 | 0.702 | 2.622 | 0.671 |
| 5. SC  | 3.872 | 0.798 | 4.134 | 0.606 |

**Note.** SB=School bullying, PSA= Positive social adaptation, NSA= Negative social adaptation, SD= Self-disclosure, SC= School connectedness.

298 Pearson correlation analysis was used to explore the association of key variables.  
 299 As presented in Table 2, school bullying was negatively associated with positive  
 300 social adaptation ( $r = -0.279, p < 0.01$ ), self-disclosure ( $r = -0.211, p < 0.01$ ), school  
 301 connectedness ( $r = -0.399, p < 0.01$ ), while it was positively associated with negative  
 302 social adaptation ( $r = 0.288, p < 0.01$ ). Positive social adaptation was positively  
 303 correlated with self-disclosure ( $r = 0.252, p < 0.01$ ) and school connectedness ( $r =$   
 304  $0.592, p < 0.01$ ), but negatively correlated with negative social adaptation ( $r = -0.357,$   
 305  $p < 0.01$ ). In addition, negative social adaptation had significantly negative  
 306 relationships with self-disclosure ( $r = -0.161, p < 0.01$ ) and school connectedness ( $r =$   
 307  $-0.435, p < 0.01$ ). A significantly positive association was found between  
 308 self-disclosure and school connectedness ( $r = 0.239, p < 0.01$ ).

**Table 2. Correlation analysis of key variables**

| Variable | 1        | 2        | 3        | 4       | 5 |
|----------|----------|----------|----------|---------|---|
| 1. SB    | 1        |          |          |         |   |
| 2. PSA   | -0.279** | 1        |          |         |   |
| 3. NSA   | 0.288**  | -0.357** | 1        |         |   |
| 4. SD    | -0.211** | 0.252**  | -0.161** | 1       |   |
| 5. SC    | -0.399** | 0.592**  | -0.435** | 0.239** | 1 |

**Note.** SB=School bullying, PSA= Positive social adaptation, NSA= Negative social adaptation, SD= Self-disclosure, SC= School connectedness. \*\* $p < 0.01$ .

### 309 3.3. Mediation Effect Analyses

#### 310 3.3.1. Mediating Effects between School Bullying and Positive Social

#### 311 Adaptation

312 After data standardization, a serial mediation model was constructed to examine  
 313 the possible impacts of self-disclosure and school connectedness on the relationship  
 314 between school bullying and positive social adaptation. Results of regression analyses  
 315 (Table 3) showed that school bullying could negatively predict positive social  
 316 adaptation ( $\beta = -0.261, t = -5.618, p < 0.001$ ) and self-disclosure

**Table 3. Regression analysis of pathways between school bullying and social adaptation**

| Outcome                                               | Predictor | R     | R <sup>2</sup> | $\beta$ | 95% CI |        | t         |
|-------------------------------------------------------|-----------|-------|----------------|---------|--------|--------|-----------|
|                                                       |           |       |                |         | LL     | UL     |           |
| <i>School bullying and positive social adaptation</i> |           |       |                |         |        |        |           |
| PSA                                                   | Gender    | 0.304 | 0.093          | 0.156   | -0.029 | 0.342  | 1.661     |
|                                                       | Grade     |       |                | -0.232  | -0.433 | -0.032 | -2.276*   |
|                                                       | SB        |       |                | -0.261  | -0.353 | -0.170 | -5.618*** |
| SD                                                    | Gender    | 0.245 | 0.060          | 0.254   | 0.066  | 0.442  | 2.649**   |
|                                                       | Grade     |       |                | -0.025  | -0.229 | 0.179  | -0.242    |
|                                                       | SB        |       |                | -0.195  | -0.288 | -0.102 | -4.115*** |
| SC                                                    | Gender    | 0.448 | 0.201          | 0.253   | 0.077  | 0.428  | 2.831**   |
|                                                       | Grade     |       |                | -0.118  | -0.306 | 0.071  | -1.230    |
|                                                       | SD        |       |                | 0.146   | 0.059  | 0.234  | 3.286**   |
|                                                       | SB        |       |                | -0.348  | -0.436 | -0.261 | -7.819*** |
|                                                       | PSA       |       |                | -0.032  | -0.189 | 0.125  | -0.402    |
| PSA                                                   | Grade     | 0.609 | 0.371          | -0.162  | -0.330 | -0.005 | -1.903    |
|                                                       | SD        |       |                | 0.115   | 0.036  | 0.194  | 2.871**   |
|                                                       | SC        |       |                | 0.550   | 0.466  | 0.634  | 12.826*** |
|                                                       | SB        |       |                | -0.032  | -0.115 | 0.052  | -0.745    |
|                                                       | NSA       |       |                | -0.032  | -0.115 | 0.052  | -0.745    |
| <i>School bullying and negative social adaptation</i> |           |       |                |         |        |        |           |
| NSA                                                   | Gender    | 0.316 | 0.100          | -0.149  | -0.333 | 1.246  | -1.583    |
|                                                       | Grade     |       |                | 0.257   | 0.057  | 0.457  | 2.528*    |
|                                                       | SB        |       |                | 0.270   | 0.179  | 0.361  | 5.826***  |
| SD                                                    | Gender    | 0.245 | 0.060          | 0.254   | 0.066  | 0.442  | 2.649**   |
|                                                       | Grade     |       |                | -0.025  | -0.229 | 0.179  | -0.242    |
|                                                       | SB        |       |                | -0.195  | -0.288 | -0.102 | -4.115*** |
| SC                                                    | Gender    | 0.448 | 0.201          | 0.253   | 0.077  | 0.428  | 2.831**   |
|                                                       | Grade     |       |                | -0.118  | -0.306 | 0.071  | -1.230    |
|                                                       | SD        |       |                | 0.146   | 0.059  | 0.234  | 3.286**   |
|                                                       | SB        |       |                | -0.348  | -0.436 | -0.261 | -7.819*** |
|                                                       | NSA       |       |                | -0.031  | -0.207 | 0.144  | -0.350    |
| NSA                                                   | Grade     | 0.465 | 0.216          | 0.211   | 0.027  | 0.024  | 2.219*    |
|                                                       | Grade     |       |                | 0.211   | 0.027  | 0.024  | 2.219*    |



|    |        |        |        |           |
|----|--------|--------|--------|-----------|
| SD | -0.044 | -0.132 | 0.044  | -0.977    |
| SC | -0.366 | -0.461 | -0.272 | -7.655*** |
| SB | 0.123  | 0.030  | 0.216  | 2.611**   |

**Note.** SB=School bullying, PSA= Positive social adaptation, NSA= Negative social adaptation, SD= Self-disclosure, SC= School connectedness. CI= confidence interval, LL= lower limit, UL= upper limit. \*  $p < 0.05$ , \*\* $p < 0.01$ , \*\*\* $p < 0.001$ .

317 ( $\beta = -0.195, t = -4.115, p < 0.001$ ). Besides, school connectedness could be predicted  
 318 by both self-disclosure ( $\beta = 0.146, t = 3.286, p < 0.01$ ) and school bullying ( $\beta =$   
 319  $-0.348, t = -7.819, p < 0.001$ ). But when adding all the variables into the model,  
 320 school bullying ( $\beta = -0.032, t = -0.745, P > 0.05$ ), rather than self-disclosure ( $\beta =$   
 321  $0.115, t = -2.871, p < 0.01$ ) or school connectedness ( $\beta = 0.550, t = 12.826, p < 0.001$ ),  
 322 failed to predict positive social adaptation.

**Table 4. Standardized indirect effects from school bullying and social adaptation**

|                                                       | Indirect Effect | SE    | 95% CI |        | Ratio of Indirect to Total Effect (%) |
|-------------------------------------------------------|-----------------|-------|--------|--------|---------------------------------------|
|                                                       |                 |       | LL     | UL     |                                       |
| <i>School bullying and positive social adaptation</i> |                 |       |        |        |                                       |
| Total Indirect                                        | -0.230          | 0.031 | -0.294 | -0.174 | 88.12%                                |
| Via SD                                                | -0.022          | 0.010 | -0.044 | -0.006 | 8.43%                                 |
| Via SC                                                | -0.192          | 0.031 | -0.257 | -0.133 | 73.56%                                |
| Via SD and SC                                         | -0.016          | 0.006 | -0.029 | -0.006 | 6.13%                                 |
| <i>School bullying and negative social adaptation</i> |                 |       |        |        |                                       |
| Total Indirect                                        | 0.147           | 0.029 | 0.092  | 0.207  | 54.44%                                |
| Via SD                                                | 0.009           | 0.009 | -0.010 | 0.026  | 3.33%                                 |
| Via SC                                                | 0.128           | 0.027 | 0.077  | 0.184  | 47.41%                                |
| Via SD and SC                                         | 0.010           | 0.004 | 0.004  | 0.021  | 3.70%                                 |

**Note.** SB=School bullying, PSA= Positive social adaptation, NSA= Negative social adaptation, SD= Self-disclosure, SC= School connectedness. CI=

confidence interval, LL= lower limit, UL= upper limit.

323 Further analyses suggested that self-disclosure and school connectedness played  
324 mediating roles in the association between school bullying and positive social

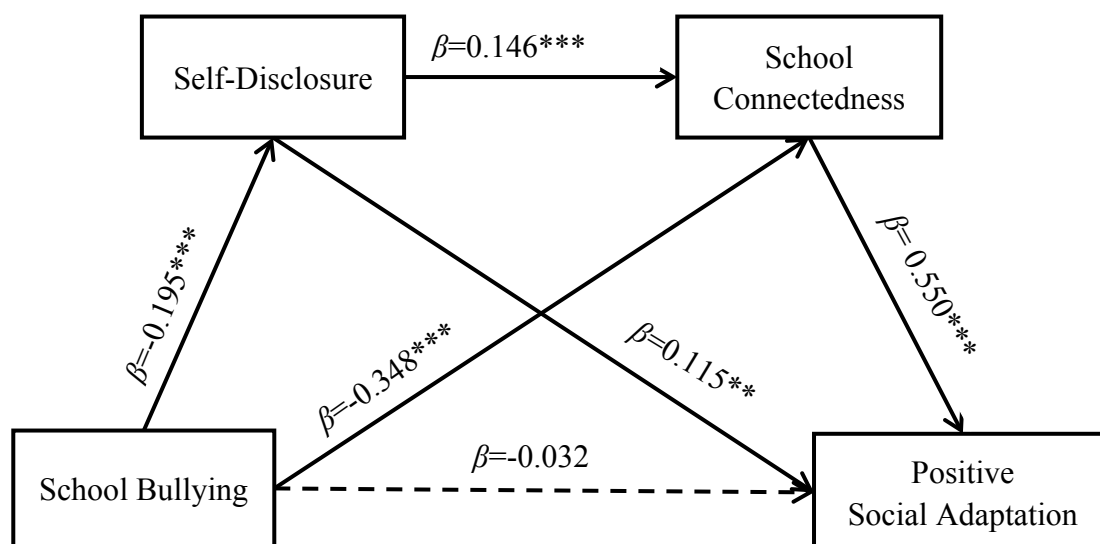

**Figure 2. The serial mediation model between school bullying and positive social adaptation**  
*Note.* \*\* $p < 0.01$ , \*\*\* $p < 0.001$ .

325 adaptation (Table 4). Figure 2 displays the direct and indirect pathways.

326 Self-disclosure mediated the pathway from school bullying to positive social

327 adaptation ( $\beta = -0.022$ , 95%  $CI = [-0.044, -0.006]$ ). In particular, school bullying

328 could predict less self-disclosure, which further led to less positive social adaptation.

329 Similarly, school bullying could also result in less positive social adaptation via

330 decreasing school connectedness ( $\beta = -0.192$ , 95%  $CI = [-0.257, -0.133]$ ). In terms of

331 the serial mediation effects, results suggested that school bullying reduced

332 self-disclosure, which caused less school connection, when then further decreased

333 positive social adaptation ( $\beta = -0.016$ , 95%  $CI = [-0.029, -0.006]$ ).

### 334 3.3.2. Mediating Effects between School Bullying and Negative Social

### 335 Adaptation

336 Likewise, another serial mediation model was also constructed to test the possible  
337 influence of self-disclosure and school connectedness on the association between  
338 school bullying and negative social adaptation. Results of regression analyses (Table  
339 3) revealed that school bullying could predict negative social adaptation ( $\beta = 0.270$ ,  $t$   
340  $= 5.826$ ,  $p < 0.001$ ), self-disclosure ( $\beta = -0.195$ ,  $t = -4.115$ ,  $p < 0.001$ ) and school  
341 connectedness ( $\beta = -0.348$ ,  $t = -7.819$ ,  $p < 0.001$ ). Self-disclosure had a significantly  
342 positive impact on school connectedness ( $\beta = 0.146$ ,  $t = 3.286$ ,  $p < 0.01$ ). When  
343 taking all those variables into the model, school connectedness ( $\beta = -0.366$ ,  $t = -7.655$ ,  
344  $p < 0.001$ ) and school bullying ( $\beta = 0.123$ ,  $t = 2.611$ ,  $p < 0.01$ ) could predict negative  
345 social adaptation significantly.

346 Further pathway analyses reported that self-disclosure and school connectedness  
347 played mediating roles in the association between school bullying and negative social  
348 adaptation (Table 4). As displayed in Figure 3, school bullying had an effect on  
349 negative social adaptation via school connectedness ( $\beta = 0.128$ , 95% CI = [0.077,  
350 0.184]). Moreover, a chain mediating path from self-disclosure to school  
351 connectedness was significant between school bullying and negative social adaptation

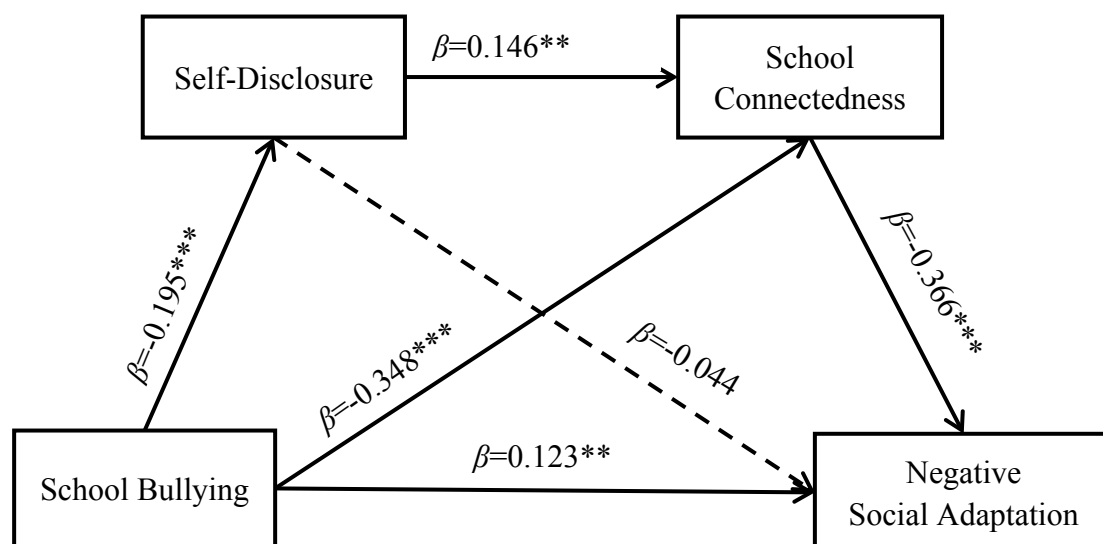

**Figure 3. The serial mediation model between school bullying and negative social adaptation**  
*Note.* \*\* $p < 0.01$ , \*\*\* $p < 0.001$ .

352 ( $\beta = 0.010$ , 95%  $CI = [0.004, 0.021]$ ).

## 353 **4. Discussion**

354 The present study attempts to figure out the complex relationship between school  
355 bullying and social adaptation during adolescence by simultaneously assessing the  
356 mediation effects of self-disclosure and school connectedness in a serial mediation  
357 model. Structural equation modeling was performed to analyze data from a sample of  
358 Chinese students, and the findings generally supported the hypothesized model.  
359 School bullying had an influence on social adaptation through the mediating pathways  
360 of self-disclosure and school connectedness. Below, these findings will be discussed  
361 in more detail.

362 To start, the first hypothesis, that there is a significant connection between school  
363 bullying and social adaptation, was supported among Chinese adolescents.  
364 Specifically, school bullying could negatively predict positive social adaptation while  
365 it could positively predict negative social adaptation. That is, compared with  
366 adolescents without experiencing school bullying, those who are involved in bullying  
367 others are more likely to develop less positive social adaptation outcomes and more  
368 negative social adaptation outcomes. This finding is consistent with previous research,  
369 which indicates a significant relationship between school bullying and specific  
370 content of social adaptation (e.g., self-affirmation, prosocial behavior, and social  
371 alienation) [16, 19, 23]. Moreover, this finding extends existing literature by  
372 providing direct evidence for the relationship between school bullying and  
373 adolescents' social adaptation.

374 One possible explanation of this finding given by developmental contextualism is  
375 that individuals have an impact on their environment. Meanwhile, individual  
376 development will also be affected by the environment [25]. Adolescent bullying will  
377 have negative impacts on victims, such as physical injury and psychological harm. In  
378 the meantime, bullying will have adverse effects on bullies as well. The most  
379 immediate consequence is that they will be punished, excluded, and lose friendships  
380 because their peers will feel threatened by them and keep a wide berth away from  
381 them. Thus, it will lead to negative social adaptation for bullies, such as social  
382 alienation. More seriously, bullies will develop the cognitive bias of believing that  
383 bullying others is a symbol of power, while actually bullying is considered a deviant  
384 behavior in violation of the moral rules. With this cognitive bias, it will be difficult  
385 for bullies to develop positive social adaptations such as prosocial behaviors.

386 Similar to Adams and Cantin's [42] study of the buffering effect of  
387 self-disclosure, the present study revealed that self-disclosure mediated the  
388 relationship between school bullying and positive social adaptation, rather than  
389 negative social adaptation. That is, the second hypothesis partly received support.  
390 Adolescents involved in school bullying are less likely to disclose themselves, which  
391 is not beneficial to positive social adaptation. Theoretically, this finding integrates  
392 previous independent studies on the association between self-disclosure and school  
393 bullying and social adaptation [31, 32], by revealing its mediating effect. Besides, this  
394 finding provides an important pathway for practitioners to prevent adolescents from  
395 being influenced by school bullying.

396 According to the social penetration theory, self-disclosure is critical in the  
397 development of interpersonal connections and social adaptation [37]. Because  
398 self-disclose can contribute to information exchange, making oneself understood by  
399 others, and then others will respond to the information. The feedback, especially the  
400 positive one, can assist one in keeping or correcting behaviors. In the long term,  
401 adolescents will be more likely to ask for advice or feedback when they are facing  
402 difficulties. That is, they will cope in positive ways and take action efficiently.  
403 Moreover, they will gradually develop self-affirmation and confidence in themselves.  
404 All of these positive effects could promote positive social adaptation later. However,  
405 being involved in bullying others will make adolescents feel unsafe and unsupported,  
406 so they are not willing to disclose themselves. Thus, it is not possible for bullies to  
407 benefit from the feedback of self-disclosure. Their violent behaviors, as well as their  
408 cognitive biases, will not be corrected. As a result, bullies will face more maladaptive  
409 developmental problems. Additionally, although self-disclosure was negatively  
410 related to negative social adaptation and positively related to school bullying, it could  
411 not mediate the association between them. One possible reason is the masking effect  
412 of other pathways. Compared with the direct association and the mediating pathway  
413 through school connectedness, the mediating function of self-disclosure is too  
414 marginal to be significant. Even if it is remarkable in the association between school  
415 bullying and positive social adaptation, self-disclosure still plays a much smaller role  
416 compared to school connectedness.

417 In addition, school connectedness is another mediator between school bullying

418 and social adaptation, which is in favor of the third hypothesis. Experiencing bullying  
419 others at school will make adolescents disconnect with their schools, which will lead  
420 to less positive social adaptation and more negative social adaptation. This finding is  
421 similar to the prior results of Liu et al.'s study [51] and Loukas and Pasch's study  
422 [52]. Moreover, it is consistent with prior studies that school connectedness is closely  
423 associated with adolescent school bullying and social adaptation outcomes [48, 49,  
424 51]. This finding extends previous independent studies on the association between  
425 self-disclosure and school bullying and social adaptation by revealing its mediating  
426 role. Besides, it also provides another pathway for practitioners to prevent adolescents  
427 from suffering the harmful consequences of school bullying.

428 Furthermore, a combination of social identity theory and Maslow's hierarchy of  
429 needs theory could provide a better understanding of this finding [64, 65]. The  
430 membership of social groups is an important part of self-concept. In social interaction,  
431 people always strive to maintain a positive social identity to enhance their sense of  
432 self-worth. Additionally, individuals have a need for belonging and love. Therefore,  
433 in order to seek membership, a sense of belonging, and love, adolescents will spare no  
434 effort to build associations with their schools, teachers, and peers. As mentioned  
435 before, building relationships at school is a rehearsal and preparation to build  
436 connectedness with the real world. A well-prepared individual is more likely to adapt  
437 to a complex society [48]. However, experiencing bullying at school will make  
438 adolescents feel insecure, competitive, and even dangerous, so it will be very difficult  
439 for them to connect with school, and they will not feel supported, recognized, and

440 valuable. As a result, it is not easy for them to positively adapt to the social  
441 environment.

442 Another important finding of the present study is that self-disclosure and school  
443 connectedness serve as serial mediators between school bullying and social adaptation  
444 during adolescence, which supports the fourth hypothesis. Experiencing school  
445 bullying will make adolescents less willing to disclose themselves. Sequentially, they  
446 might not build a connection with their school, which will influence their adaptation  
447 to society. To a certain degree, this finding provides support for the social penetration  
448 theory by stressing that self-disclosure is indeed conducive to building connections.  
449 Moreover, this finding extends prior studies by figuring out that, in addition to the  
450 independent mediating effects, self-disclosure and school connectedness jointly have  
451 a sequential mediating effect on the relationship between school bullying and social  
452 adaptation. Although the magnitude of the chain mediation is not the largest, it still  
453 has an efficient influence on the intervention to avoid the effects of school bullying  
454 for adolescents. Theoretically speaking, this finding encourages future studies to draw  
455 attention to further associations between mediators.

456 Similarly, a combination of the disclosure reciprocity effect and social  
457 penetration theory could also help better understand this finding [37, 53]. Knowing  
458 each other is a prerequisite for establishing a relationship. That is, self-disclosure  
459 plays a fundamental role in building connections with others. Self-disclosure will  
460 make adolescents feel supported, cared for, and encouraged at school. As a result,  
461 they will tightly connect with their peers, teachers, and schools. However,



462 engagement in school bullying as bullies will make them feel the unequal power and  
463 status between themselves and others [1], which consequently will reduce the  
464 willingness of bullies to disclose themselves to others [31, 32]. Without  
465 self-disclosure, they will not build close connections with schools. More seriously,  
466 this kind of social alienation and withdrawal will have harmful impacts on their  
467 adaptation to society.

468 In summary, the present study makes several contributions to the research domain  
469 of school bullying. First, the present study extends the previous literature by directly  
470 investigating the influences of school bullying on adolescent positive and negative  
471 social adaptation. This direct finding repeatedly stresses the necessity to intervene in  
472 school bullying. Second, the present study figures out the three underlying  
473 mechanisms, which assist us in further understanding the relationship between school  
474 bullying and social adaptation. Practically, these mechanisms also provide more  
475 pathways for intervention in school bullying. Third, the sequential mediation effect in  
476 the present study suggests the interaction between the school subsystem and the  
477 individual subsystem in adolescence. This encourages future studies to focus on the  
478 complicated and dynamic associations between the environment and individuals.

479 Despite its unique advantages, the present study is not without limitations. First,  
480 with regard to participants, the present study has only recruited 434 Chinese junior  
481 high school students, which is not a large sample. Also, the findings cannot be  
482 generalized to other countries. So, future studies can include more participants from  
483 different cultural backgrounds. Second, all the data is collected by self-reported

484 questionnaires, which cannot avoid the potential bias. Therefore, future studies can  
485 use other ways to collect data, such as combining other-reported questionnaires and  
486 other indicators. Third, the present study used a cross-sectional design, which cannot  
487 obtain causal results, but adolescent development is a dynamic process. Thus, future  
488 studies should use a longitudinal design to further explore the relationship between  
489 school bullying and social adaptation. Fourth, the present study did not involve any  
490 moderators to assess the stability of the relationship between school bullying and  
491 social adaptation in different situations. Compared to their counterparts with low  
492 self-control, adolescents with high self-control have fewer bullying behaviors and  
493 develop more positive outcomes, which indicates their high level of positive social  
494 adaptation to a certain degree [66, 67]. This suggests that future studies could attempt  
495 to evaluate the possible moderating role of self-control in the aforesaid relationship.

496 By constructing a serial mediation model, the present study demonstrated that  
497 school bullying has an influence on adolescent social adaptation directly as well as  
498 indirectly through the serial mediating mechanisms of self-disclosure and school  
499 connectedness. These findings highlight the importance of simultaneously examining  
500 self-disclosure and school connectedness as mediators between school bullying and  
501 adolescent social adaptation. Regarding interventions aimed to prevent or reduce  
502 adolescent school bullying, practitioners should pay more attention to the combined  
503 application of individual and environmental factors.

#### 504 **Abbreviations**

505 SB: School bullying; PSA: Positive social adaptation; NSA: Negative social

506 adaptation; SD: Self-disclosure; SC: School connectedness.

507

## 508 **Declarations**

### 509 **Ethics approval and consent to participate**

510 This study was approved by the Research Ethics Committee of the College of  
511 Education and Sports Sciences, Yangtze University. All participants agreed to  
512 participate and provided informed consent.

### 513 **Consent for publication**

514 Not applicable.

### 515 **Availability of data and materials**

516 The datasets used and/or analysed during the current study are available from the  
517 corresponding author on reasonable request.

### 518 **Competing interests**

519 The authors declare that they have no competing interests.

### 520 **Funding**

521 This research was supported by Youth project of Science and Technology Research  
522 Plan of Department of Education of Hubei Province in 2020 (Q20201306), Project of  
523 Social Science Foundation of Young Scholar Support Plan of Yangtze University in  
524 2020 (2020skq24), and Project of Social Science Foundation of Yangtze University in  
525 2021 (2021csy15).

### 526 **Authors' contributions**

527 XG designed the work. R-JZ, HL, P-YW, XJ and C-SZ collected the data. R-JZ and  
528 G-XX analyzed the data. G-XX drafted and revised the manuscript.

### 529 **Acknowledgements**

530 To the students, parents, teachers, and school staff who made this project possible.

531

### 532 **Reference**

- 533 1. Olweus, D. (2013). School bullying: Development and some important  
534 challenges. *Annual review of clinical psychology*, 9, 751-780.  
535 <https://doi.org/10.1146/annurev-clinpsy-050212-185516>

- 536 2. Kennedy, R. S. (2020). A meta-analysis of the outcomes of bullying prevention  
537 programs on subtypes of traditional bullying victimization: Verbal, relational, and  
538 physical. *Aggression and violent behavior*, 55, 101485.  
539 <https://doi.org/10.1016/j.avb.2020.101485>.
- 540 3. Romano, I., Butler, A., Patte, K. A., Ferro, M. A., & Leatherdale, S. T. (2020).  
541 High school bullying and mental disorder: an examination of the association with  
542 flourishing and emotional regulation. *International journal of bullying*  
543 *prevention*, 2(4), 241-252. <https://doi.org/10.1007/s42380-019-00035-5>
- 544 4. Simmons, J. A., & Antshel, K. M. (2021). Bullying and depression in Youth with  
545 ADHD: A systematic review. *Child & Youth Care Forum*, 50(3),  
546 379-414. <https://doi.org/10.1007/s10566-020-09586-x>
- 547 5. Farrell, A. H., & Vaillancourt, T. (2021). The Impact of Childhood Bullying  
548 Trajectories on Young Adulthood Antisocial Trajectories. *Journal of Youth and*  
549 *Adolescence*, 50, 1782-1796. <https://doi.org/10.1007/s10964-021-01456-6>
- 550 6. Wolke, D., Copeland, W. E., Angold, A., & Costello, E. J. (2013). Impact of  
551 bullying in childhood on adult health, wealth, crime, and social  
552 outcomes. *Psychological science*, 24(10), 1958-1970.  
553 <https://doi.org/10.1177%2F0956797613481608>
- 554 7. Savahl, S., Montserrat, C., Casas, F., Adams, S., Tiliouine, H., Benninger, E., &  
555 Jackson, K. (2019). Children's experiences of bullying victimization and the  
556 influence on their subjective well-being: A multinational comparison. *Child*  
557 *development*, 90(2), 414-431. <https://doi.org/10.1111/cdev.13135>
- 558 8. Varela, J. J., Fábrega, J., Carrillo, G., Benavente, M., Alfaro, J., & Rodríguez, C.  
559 (2020). Bullying and subjective well-being: A hierarchical socioeconomic  
560 status analysis of Chilean adolescents. *Children and Youth Services Review*, 118,  
561 105398. <https://doi.org/10.1016/j.childyouth.2020.105398>
- 562 9. UNESCO (2019). *Behind the numbers: Ending school violence and bullying*.  
563 [https://www.unicef.org/documents/behind-numbers-ending-school-violence-and-](https://www.unicef.org/documents/behind-numbers-ending-school-violence-and-bullying)  
564 bullying

- 565 10. Zhang, Y., Li, Z., Tan, Y., Zhang, X., Zhao, Q., & Chen, X. (2021). The  
566 influence of personality traits on school bullying: a moderated mediation  
567 model. *Frontiers in psychology, 12*, 1903.  
568 <https://doi.org/10.3389/fpsyg.2021.650070>
- 569 11. Chen, X., Li, L., Lv, G., & Li, H. (2021). Parental behavioral control and bullying  
570 and victimization of rural adolescents in China: the roles of deviant peer  
571 affiliation and gender. *International journal of environmental research and  
572 public health, 18*(9), 4816. <https://doi.org/10.3390/ijerph18094816>
- 573 12. Arcadepani, F. B., Eskenazi, D. Y., Fidalgo, T. M., & Hong, J. S. (2021). An  
574 exploration of the link between bullying perpetration and substance use: a review  
575 of the literature. *Trauma, Violence, & Abuse, 22*(1), 207-214.  
576 <https://doi.org/10.1177%2F1524838019837593>
- 577 13. Cialdini, R. B., & Goldstein, N. J. (2004). Social influence: Compliance and  
578 conformity. *Annu. Rev. Psychol., 55*, 591-621.  
579 <https://doi.org/10.1146/annurev.psych.55.090902.142015>
- 580 14. Zou, H., Liu, Y., Zhang, W., Jiang, S., Zhou, H., & Yu, Y. (2015). Adolescents'  
581 social adjustment: a conceptual model, assessment and multiple protective and  
582 risk factors. *Psychological Development and Education, 31*(1), 29-36.
- 583 15. O'Moore, M., & Kirkham, C. (2001). Self-esteem and its relationship to bullying  
584 behavior. *Aggressive Behavior: Official Journal of the International Society for  
585 Research on Aggression, 27*(4), 269-283. <https://doi.org/10.1002/ab.1010>
- 586 16. Wang, X., Zhang, Y., Hui, Z., Bai, W., Terry, P. D., Ma, M., ... & Wang, M.  
587 (2018). The mediating effect of regulatory emotional self-efficacy on the  
588 association between self-esteem and school bullying in middle school students: a  
589 cross-sectional study. *International journal of environmental research and public  
590 health, 15*(5), 991. <https://doi.org/10.3390/ijerph15050991>
- 591 17. Andreou, E. (2004). Bully/victim problems and their association with  
592 Machiavellianism and self-efficacy in Greek primary school children. *British  
593 Journal of Educational Psychology, 74*(2), 297-309.  
594 <https://doi.org/10.1348/000709904773839897>
- 595 18. Kokkinos, C. M., & Kipritsi, E. (2012). The relationship between bullying,  
596 victimization, trait emotional intelligence, self-efficacy and empathy among

- 597 preadolescents. *Social psychology of education*, 15(1), 41-58.  
598 <https://doi.org/10.1007/s11218-011-9168-9>
- 599 19. Raskauskas, J. L., Gregory, J., Harvey, S. T., Rifshana, F., & Evans, I. M. (2010).  
600 Bullying among primary school children in New Zealand: Relationships with  
601 prosocial behaviour and classroom climate. *Educational Research*, 52(1), 1-13.  
602 <https://doi.org/10.1080/00131881003588097>
- 603 20. Van den Brande, W., Baillien, E., De Witte, H., Vander Elst, T., & Godderis, L.  
604 (2016). The role of work stressors, coping strategies and coping resources in the  
605 process of workplace bullying: A systematic review and development of a  
606 comprehensive model. *Aggression and Violent Behavior*, 29, 61-71.  
607 <https://doi.org/10.1016/j.avb.2016.06.004>
- 608 21. Yin, X. Q., Wang, L. H., Zhang, G. D., Liang, X. B., Li, J., Zimmerman, M. A.,  
609 & Wang, J. L. (2017). The promotive effects of peer support and active coping on  
610 the relationship between bullying victimization and depression among Chinese  
611 boarding students. *Psychiatry research*, 256, 59-65.  
612 <https://doi.org/10.1016/j.psychres.2017.06.037>
- 613 22. Delfabbro, P., Winefield, T., Trainor, S., Dollard, M., Anderson, S., Metzger, J., &  
614 Hammarstrom, A. (2006). Peer and teacher bullying/victimization of South  
615 Australian secondary school students: Prevalence and psychosocial  
616 profiles. *British Journal of Educational Psychology*, 76(1), 71-90.  
617 <https://doi.org/10.1348/000709904X24645>
- 618 23. Rudolph, K. D., Lansford, J. E., Agoston, A. M., Sugimura, N., Schwartz, D.,  
619 Dodge, K. A., ... & Bates, J. E. (2014). Peer victimization and social alienation:  
620 Predicting deviant peer affiliation in middle school. *Child development*, 85(1),  
621 124-139. <https://doi.org/10.1111/cdev.12112>
- 622 24. Coelho, V. A., & Romão, A. M. (2018). The relation between social anxiety,  
623 social withdrawal and (cyber) bullying roles: A multilevel analysis. *Computers in*  
624 *Human Behavior*, 86, 218-226. <https://doi.org/10.1016/j.chb.2018.04.048>
- 625 25. Lerner, R. M. (1992). Dialectics, developmental contextualism, and the further  
626 enhancement of theory about puberty and psychosocial development. *The Journal*  
627 *of Early Adolescence*, 12(4), 366-388.  
628 <https://doi.org/10.1177/0272431692012004002>
- 629 26. Hemphill, S. A., Kotevski, A., Herrenkohl, T. I., Bond, L., Kim, M. J.,  
630 Toumbourou, J. W., & Catalano, R. F. (2011). Longitudinal consequences of  
631 adolescent bullying perpetration and victimisation: A study of students in  
632 Victoria, Australia. *Criminal Behaviour and Mental Health*, 21(2), 107-116.  
633 <https://doi.org/10.1002/cbm.802>

- 634 27. Stuart, J., & Jose, P. E. (2014). Is bullying bad for your health? The consequences  
635 of bullying perpetration and victimization in childhood on health behaviors in  
636 adulthood. *Journal of aggression, conflict and peace research*.  
637 <https://doi.org/10.1108/JACPR-01-2014-0003>
- 638 28. Derlega, V. J., Metts, S., Petronio, S., & Margulis, S. T. (1993). *Self-disclosure*.  
639 Sage Publications, Inc.
- 640 29. Pan, W., Feng, B., Wingate, V., & Li, S. (2020). What to say when seeking  
641 support online: A comparison among different levels of self-disclosure. *Frontiers*  
642 *in psychology, 11*, 978. <https://doi.org/10.3389/fpsyg.2020.00978>
- 643 30. Karsay, K., Schmuck, D., Matthes, J., & Stevic, A. (2019). Longitudinal effects  
644 of excessive smartphone use on stress and loneliness: The moderating role of  
645 self-disclosure. *Cyberpsychology, Behavior, and Social Networking, 22*(11),  
646 706-713. <https://doi.org/10.1089/cyber.2019.0255>
- 647 31. Georgiou, S. N., & Stavrinides, P. (2013). Parenting at home and bullying at  
648 school. *Social psychology of education, 16*(2),  
649 165-179. <https://doi.org/10.1007/s11218-012-9209-z>
- 650 32. Jones, J. L., Kahn, J. H., & Sullivan, S. D. (2020). Relational aggression  
651 victimization as a predictor of middle-school girls' self-disclosure to  
652 peers. *Violence and victims, 35*(1), 54-67.  
653 <https://doi.org/10.1891/0886-6708.VV-D-18-00085>
- 654 33. Won, J., & Seo, D. (2017, September). Relationship between self-disclosure and  
655 cyberbullying on sns. In *European, Mediterranean, and Middle Eastern*  
656 *Conference on Information Systems* (pp. 154-172). Springer, Cham.  
657 [https://doi.org/10.1007/978-3-319-65930-5\\_13](https://doi.org/10.1007/978-3-319-65930-5_13)
- 658 34. Asadi, S. M., & Ghaseminejad, M. A. (2018). The role of Internet addiction and  
659 self-disclosure in predicting cyberbullying in students. *Journal of School*  
660 *Psychology, 7*(3), 7-22. <https://doi.org/10.22098/JSP.2018.726>
- 661 35. Aizenkot, D. (2020). Social networking and online self-disclosure as predictors of  
662 cyberbullying victimization among children and youth. *Children and Youth*  
663 *Services Review, 119*, 105695. <https://doi.org/10.1016/j.childyouth.2020.105695>
- 664 36. YEŞİLYURT, F., Arslan, N., & Arslan, S. (2021). Cyber Bullying and  
665 Self-Disclosure: The predicting role of Cyber Bullying. *Malaysian Online*  
666 *Journal of Educational Technology, 9*(1), 19-25.  
667 <http://dx.doi.org/10.17220/mojet.2021.9.1.239>
- 668 37. Altman, I., & Taylor, D. A. (1973). *Social penetration: The development of*  
669 *interpersonal relationships*. Holt, Rinehart & Winston.
- 670 38. Nehra, N. S., & Rangnekar, S. (2017). Relationship understanding between  
671 emotional stability, self-disclosure and social adjustment. *Journal of Intercultural*



- 672        *Communication Research*, 46(6), 558-578.  
673        <https://doi.org/10.1080/17475759.2017.1387165>
- 674    39. Nehra, N. S., & Rangnekar, S. (2019). Does emotional stability mediate the  
675        relationship between self-disclosure, personality integration, and social  
676        adjustment? *International Journal of Business Excellence*, 17(1), 58-82.  
677        <https://doi.org/10.1504/IJBEX.2019.096904>
- 678    40. Wei, J. (2019). *The effect of self-disclosure on social adaption: the chain*  
679        *mediating role of self-concept clarity and friendship quality*. Master thesis at  
680        Wuhan Sports University. <https://doi.org/10.27384/d.cnki.gwhtc.2019.000258>
- 681    41. Yu, M. (2018). *A research on the relationship between self-disclosure and social*  
682        *adaptation of junior high school students*. Master thesis at Yanbian University.
- 683    42. Adams, R. E., & Cantin, S. (2013). Self-disclosure in friendships as the  
684        moderator of the association between peer victimization and depressive  
685        symptoms in overweight adolescents. *The Journal of Early Adolescence*, 33(3),  
686        341-362. <https://doi.org/10.1177%2F0272431612441068>
- 687    43. Wilson, D. (2004). The interface of school climate and school connectedness and  
688        relationships with aggression and victimization. *Journal of school health*, 74,  
689        293-303. <https://doi.org/10.1111/j.1746-1561.2004.tb08286.x>
- 690    44. Li, D., Li, X., Wang, Y., Zhao, L., Bao, Z., & Wen, F. (2013). School  
691        connectedness and problematic Internet use in adolescents: A moderated  
692        mediation model of deviant peer affiliation and self-control. *Journal of abnormal*  
693        *child psychology*, 41(8), 1231-1242. <https://doi.org/10.1007/s10802-013-9761-9>
- 694    45. Skues, J. L., Cunningham, E. G., & Pokharel, T. (2005). The influence of  
695        bullying behaviours on sense of school connectedness, motivation and  
696        self-esteem. *Journal of Psychologists and Counsellors in Schools*, 15(1), 17-26.  
697        <https://doi.org/10.1375/ajgc.15.1.17>
- 698    46. Diaz, E. M., Kosciw, J. G., & Greytak, E. A. (2010). School connectedness for  
699        lesbian, gay, bisexual, and transgender youth: in-school victimization and  
700        institutional supports. *The Prevention Researcher*, 17(3),  
701        15-18. [https://link.gale.com/apps/doc/A259750107/AONE?u=tacoma\\_comm&sid](https://link.gale.com/apps/doc/A259750107/AONE?u=tacoma_comm&sid=googleScholar&xid=3f1df79c)  
702        [=googleScholar&xid=3f1df79c](https://link.gale.com/apps/doc/A259750107/AONE?u=tacoma_comm&sid=googleScholar&xid=3f1df79c)
- 703    47. O'Brennan, L. M., & Furlong, M. J. (2010). Relations between students'  
704        perceptions of school connectedness and peer victimization. *Journal of School*  
705        *Violence*, 9(4), 375-391. <https://doi.org/10.1080/15388220.2010.509009>
- 706    48. Loukas, A., Ripperger-Suhler, K. G., & Horton, K. D. (2009). Examining  
707        temporal associations between school connectedness and early adolescent  
708        adjustment. *Journal of youth and adolescence*, 38(6), 804-812.  
709        <https://doi.org/10.1007/s10964-008-9312-9>



- 710 49. Yin, H., Jia, L., Sun, P. (2019). Mediating role of school bonding in the  
711 association between adolescent gratitude and social adaptation. *Chinese Journal*  
712 *of School Health*, 40(1), 69-71.  
713 <https://doi.org/10.16835/j.cnki.1000-9817.2019.01.018>
- 714 50. Fergus, S., & Zimmerman, M. A. (2005). Adolescent resilience: A framework for  
715 understanding healthy development in the face of risk. *Annu. Rev. Public*  
716 *Health*, 26, 399-419.  
717 <https://doi.org/10.1146/annurev.publhealth.26.021304.144357>
- 718 51. Liu, Y., Carney, J. V., Kim, H., Hazler, R. J., & Guo, X. (2020). Victimization  
719 and students' psychological well-being: The mediating roles of hope and school  
720 connectedness. *Children and Youth Services Review*, 108, 104674.  
721 <https://doi.org/10.1016/j.childyouth.2019.104674>
- 722 52. Loukas, A., & Pasch, K. E. (2013). Does school connectedness buffer the impact  
723 of peer victimization on early adolescents' subsequent adjustment problems? *The*  
724 *Journal of Early Adolescence*, 33(2), 245-266.
- 725 53. Derlega, V. J., Wilson, M., & Chaikin, A. L. (1976). Friendship and disclosure  
726 reciprocity. *Journal of personality and social psychology*, 34(4), 578.  
727 <https://psycnet.apa.org/doi/10.1037/0022-3514.34.4.578>
- 728 54. Sprecher, S. (1987). The effects of self-disclosure given and received on affection  
729 for an intimate partner and stability of the relationship. *Journal of Social and*  
730 *Personal Relationships*, 4(2), 115-127.  
731 <https://doi.org/10.1177%2F0265407587042001>
- 732 55. Park, N., Jin, B., & Jin, S. A. A. (2011). Effects of self-disclosure on relational  
733 intimacy in Facebook. *Computers in Human Behavior*, 27(5), 1974-1983.  
734 <https://doi.org/10.1016/j.chb.2011.05.004>
- 735 56. Lee, K. T., Noh, M. J., & Koo, D. M. (2013). Lonely people are no longer lonely  
736 on social networking sites: The mediating role of self-disclosure and social  
737 support. *Cyberpsychology, Behavior, and Social Networking*, 16(6), 413-418.  
738 <https://doi.org/10.1089/cyber.2012.0553>
- 739 57. Zhang, R. (2017). The stress-buffering effect of self-disclosure on Facebook: An  
740 examination of stressful life events, social support, and mental health among  
741 college students. *Computers in Human Behavior*, 75, 527-537.  
742 <https://doi.org/10.1016/j.chb.2017.05.043>
- 743 58. Olweus D. (1996). *The revised Olweus bully/victim questionnaire*. Bergen:  
744 University of Bergen, Research Center for Health Promotion.
- 745 59. Zhang, W., & Wu, J. (1999). Revision of Chinese version of Olweus bully/victim  
746 questionnaire. *Psychological Development and Education*, 15(2), 7-11.

- 747 60. Zou, H., Jiang, S. (2008). Development of the adolescent self-disclosure with  
748 peers questionnaire. *Acta Psychologica Sinica*, 02,184-192.
- 749 61. Yu, C., Zhang, W., Zeng, Y., Ye, T., Li, Y., Wang, S. (2011). Relationship  
750 between adolescents' gratitude and problem behavior: the mediating role of  
751 school connectedness. *Psychological Development and Education*,  
752 27(04):425-433.
- 753 62. Hayes AF. (2013). *Introduction to mediation, moderation, and conditional*  
754 *process analysis: A regression-based approach*. New York, NY: Guilford Press.
- 755 63. Rodríguez-Ardura, I., & Meseguer-Artola, A. (2020). How to prevent, detect and  
756 control common method variance in electronic commerce research. *Journal of*  
757 *Theoretical and Applied Electronic Commerce*. 15(2),1-5.  
758 <https://doi.org/10.4067/S0718-18762020000200101>
- 759 64. Erlbaum. Scheepers, D., & Ellemers, N. (2019). Social identity theory. In *Social*  
760 *psychology in action* (pp. 129-143). Springer, Cham.
- 761 65. Noltemeyer, A., James, A. G., Bush, K., Bergen, D., Barrios, V., & Patton, J.  
762 (2021). The relationship between deficiency needs and growth needs: The  
763 continuing investigation of Maslow's theory. *Child & Youth Services*, 42(1),  
764 24-42. <https://doi.org/10.1080/0145935X.2020.1818558>
- 765 66. Fenny, O. A. (2021). Low self-control and school bullying: testing the GTC in  
766 Nigerian sample of middle school students. *Journal of interpersonal violence*,  
767 0886260521991286. <https://doi.org/10.1177/0886260521991286>
- 768 67. Wang, L., & Ge, T. (2021). Does victimization predict cyberbullying  
769 perpetration? Examining depression as a mediator and self-control as a  
770 moderator. *Personality and individual differences*, 183, 111135.  
771 <https://doi.org/10.1016/j.paid.2021.111135>
